# Supplementary material
Source: PubMed Central journal article supplement (PMC2613720)

# CLUSTAL X (1.83) MULTIPLE SEQUENCE ALIGNMENT

File: K:castor and pollux.ps

Date: Thu Jul 31 10:28:04 2008

Page 3 of 3

```

***** :** . * . ** :*:****:*****.**:*****.**:***:*.**:*****
Os-POLLUX LATLLLRDIQSKRLPSKELKSP-LRYNGFCHSSWIREMQHASDKSIIISEILDSRTRNLVSVSKISDYVLSNELVSMAL 558
Zm-POLLUX LATLLLRDIQSKRLPSKELKSP-HRYNGFCHSSWIREMQHASDKSIIISEILDSRTRNLVSVSKISDYVLSNELVSMAL 558
Vv-POLLUX LATLLLRDIQSKRLPDRDTKSAASRHSGFSSHSSWICEMQQASDKSIIISEILDSRTRNLVSVSRISDYVLSNELVSMAL 559
Pt-POLLUX LATLLLRDIQLKRLPHRDAKPTSLRTSGFSSHSSWIREMQQASDKSIIISEILDSRTRNLVSVSRISDYVLSNELVSMAL 559
Mt-DMI1 LATLLLRDIQSRRLPYRDTKSTSLRLSGFSSHNSWIREMQQASDKSIIISEILDSRTRNLVSVSRISDYVLSNELVSMAL 559
Ps-SYM8 LATLLLRDIQSRRLPYRDTKSTSLRLSGFSSHNSWIREMQQASDKSIIISEILDSRTRNLVSVSRISDYVLSNELVSMAL 559
Lj-POLLUX LATLLLRDIQSRRLPYKDTKSTSLRLSGFSSHNSWIREMQQASDKSIIISEILDSRTRNLVSVSRISDYVLSNELVSMAL 559
Gm-POLLUX LATLLLRDIQSRRLPYRDTKSTSLRLSGFSSHNSWIREMQQASDKSIIISEILDSRTRNLVSVSRISDYVLSNELVSMAL 559
At5g49960 LATLLLRDIQSRRLPYKDAKSSALRISGFPNCCWIRKMQQASDKSIIISEILDSRTRNLVSVSRISDYVLSNELVSMAL 558
Os-CASTOR LATLLLRDIQAKRLLPREAMVSHVTRGSFCEGSWIGEMQQASDKSVIISEILDPRTKNLLSVSKISDYVLSNELVSMAL 559
Zm-CASTOR LATLLLRDIQAKRLLPCKESLISHVPRGTFSEGSWIGEMQQASDKSVIISEILDPRTKNLLSVSKISDYVLSNELVSMAL 559
Lj-CASTOR LATLLLRDIQARRLPY-VAMASQTOGGNFKSGSWIGEMQQASDKTVIISEILDPRTKNLLSMSKISDYVLSNELVSMAL 558
Gm-CASTOR LATLLLRDIQARRLPY-VSMASQARHGGSFSGSWIGEMQQASDKTVIISEILDPRTKNLLSMSKISDYVLSNELVSMAL 558
Mt-CASTOR LATLLLRDIQARRLPY-PAMASQAHGGSFSGSWIGEMQQASDKTVIISEILDPRTKNLLSMSKISDYVLSNELVSMAL 559
Vv-CASTOR LATLLLRDIQAKRLLPREAMVTQGHGGSFSGSWIGEMQQASDKSVIISEILDPRTKNLLSMSKISDYVLSNELVSMAL 559
Pt-CASTOR LATLLLRDIQSKRLP---MVNQVRRGTFSGSWIGEMQQASDKSVIISEILDPRTKNLLSMSKISDYVLSNELVSMAL 555
ruler .....490.....500.....510.....520.....530.....540.....550.....560

```

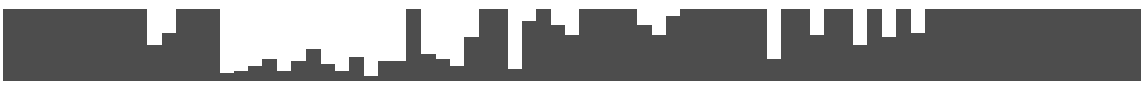

```

*****:*** **:****: : : : *::*::*:** * *::**** :*:*** * :**
Os-POLLUX AMVAEDKQINRVLEELAEEGNEMCIRSAEFYLYEQEELSFEDIMVRARERDEVVIGYRLANDDQAIINPEQKSEIRKWS 638
Zm-POLLUX AMVAEDKQINRVLEELAEEGNEMCIRSAEFYLYEQEELSFEDIMVRARERDEVVIGYRLANTDQAIINPEYKSOIRKWS 638
Vv-POLLUX AMVAEDKQINRVLEELAEEGNEMCIRPAEFYLYDQEELCFYEMIRGRQRREIVIGYRLATTEKAIINPPDKSKRRKWS 639
Pt-POLLUX AMVAEDKQINRVLEELAEEGNEMCIRPAEFYLYDQEELCFYEMIRGRQRNEIVIGYRLANAERAIINPPEKSEPRKWS 639
Mt-DMI1 AMVAEDKQINRVLEELAEEGNEMCIRPAEFYLYDQEELCFYDIMIRGRTRKEIVIGYRLANQERAIINPSEKSVPRKWS 639
Ps-SYM8 AMVAEDKQINRVLEELAEEGNEMCIRPAEFYLYDQEELCFYDIMIRGRTRKEIVIGYRLASQERAIINPPEKSMTRKWS 639
Lj-POLLUX AMVAEDKQINRVLEELAEQGNEMCIRPAEFYLYDQEELCFYDIMIRGRARQEIIIGYRLANQERAIINPSEKLVARKWS 639
Gm-POLLUX AMVAEDKQINRVLEELAEEGNEMCIRPAEFYLYDQEELCFYDINMIRGRTRKEIVIGYRLANQDRAIINPSEKSVPRKWS 639
At5g49960 AMVAEDKQINRVLEELAEKGNEMCIRPAEFYLYDQEEVCFYDIMRRARQRQEIIIGYRLAGMEQAVINPTDKSKLTKWS 638
Os-CASTOR AMVAEDKQINRVLEELAEQGNEMCIRPADLYLREDEELNFFEVMLRGRQRKEIVIGYRLVDAERAIINPPDKVSRRRWS 639
Zm-CASTOR AMVAEDKQINNVLEELAEQGNEMCIRPSDMYLRREEELNFFEVILRARQRKEIVIGYRLEAAERAIINPIDKVSRRRWS 639
Lj-CASTOR AMVAEDKQINDVLEELAEEGNEMHIRQADLYLREGEEMSFYEMILRARQRREILIGYRLANAERAVINPPAKTGRRKWS 638
Gm-CASTOR AMVAEDKQINDVLEELAEEGNEMHIRQADLYLREGEELNFFEVILRARQRREIVIGYRLANAERAVINPPVKTDRKWS 638
Mt-CASTOR AMVAEDKQINRVLEELAEQGNEMHIRQADLYLRESEKLSFYEMILRARQRREILIGYRLANAERAVINPPAKSDKWKWS 639
Vv-CASTOR AMVAEDKQINDVLEELAEETIWSIANDPAD-ELGVCEELSFYEMILRARQRREIVIGYRQSSAERAIINPPAKNEKQRWS 638
Pt-CASTOR AMVAEDKQINDVLEELAEDEGNEMCIRQADLYLSEGEELSFYEVLLRARQRREIVIGYRAANAERAVINPPAKSERRRWS 635
ruler .....570.....580.....590.....600.....610.....620.....630.....640

```

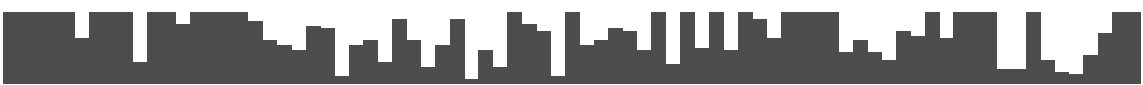

```

*****:
Os-POLLUX LDDVFVVISKGD 650
Zm-POLLUX LDDVFVVISKGD 650
Vv-POLLUX IEDVFVVISI-- 649
Pt-POLLUX LDDVFVVISLGD 651
Mt-DMI1 LDDVFVVIASGE 651
Ps-SYM8 LDDVFVVIASGE 651
Lj-POLLUX LGDVFVVIASGD 651
Gm-POLLUX LGDVFVVIKGD 651
At5g49960 LDDVFVVIASSQ 650
Os-CASTOR AKDVFVVITEKE 651
Zm-CASTOR PKDVFVVISEKE 651
Lj-CASTOR LKDVFVVITEKE 650
Gm-CASTOR LKDVFVVITEKE 650
Mt-CASTOR LKDVFVVITEKE 651
Vv-CASTOR LKDVFVVIKAEKE 650
Pt-CASTOR LKDVFVVIKAEKE 647
ruler .....650..

```

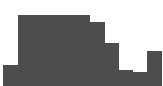

Supplement: pp.108.131540_1.pdf [file pp.108.131540_1.pdf]
