# Supplementary material
Source: PubMed Central journal article supplement (PMC2613720)
Supplement: pp.108.131540_2.pdf [file pp.108.131540_2.pdf]

>Os-POLLUX (Rice)

MAESDGGEASPSGGGGEGSPDRRPPARPQLTKSRTISGSAASAFDRWGTSNSSSSILV  
RRSSTAPLPPGAAPRGLLTVAVDEPSYAAPNGGAAMLRDWCYPSFLGPHASRPPRSQ  
QQTPTTAAAAADSRSPTPAAPPQTASVSQREEEKS LASVVKRPMLLDERRSLSPPPPQQ  
RAPRFDLSPYLVMLVTVISFSLAIWQWMKATVLQEKIRSCCSVSTVDCKTTTEAFKIN  
GQHGSDFINSADWNLASCSRMLVFAIPVFLVKYIDQLRRRNTDSIRLRSTEEVPLKKRI  
AYKVDVFFSGHPYAKLLALLLATIILIASGGIALYVVS GSGFLEALWLSWTFVADSGNHA  
DQVGLGPRIVSVSISGGMLVFATMLGLVSDAISEKVDSWRKKGSEVIEVNHILILGWS  
KLGSLKQLAIANKSIGGGVVVLAERDKEEMEMDIGLEFDFMGTSVICRSGSPLILAD  
LKKVSVSKARAIIVLASDENADQSDARALRVVLSLTGVKEGLRGHVVEMSDLNEPLVK  
LVGGELIETVVAHDVIGRLMIQCALQPGLAQIWEDILGFENAEFYIKRWPELDGMRFGDV  
LISFPDAVPCGVKIASKAGKILMNPNDYVLQEGDEVLVIAEDDDTYVPASLPQVRKGF  
PNIPTPKYPEKILFCGWRRDIHDMIMVLEAF LAPGSELWMFNEVPEKERERKLDGGMD  
IYGLTNIKLVHKEGNAVIRRHLESPLETFDSILILADESVEDSIVHSDSRSLATLLIR  
DIQSKRLPSKELKSPRYNGFCHSSWIREMQHASDKSIIISEILDSRTRNLVSVKISDY  
VLSNELVSMALAMVAEDKQINRVLEELFAEEGNEMCIRSAEFYLYEQEELFFDIMVRAR  
ERDEVVIGYRLANDDQAIINPEQKSEIRKWSLDDVFVVISKGD

>Os-CASTOR (Rice)

MPLDPDSSPAPPHRDWFFPPAPPFLPSSRARTPRAPFPSTSRSSNPYSFPDRRPPPTPRS  
RSRSLPPPEQQKQQQPPPTTPPPAPRRRDPYAGVRRGDVRTLTAEKAAAAAVPTAAQ  
VHGSKSAASATTLRWGMVSVAAIVLCFSSLVRSNSSLHDQVHHLKAQLAEATTKLQSCI  
TESSMDSSILSYQSNNSTSQNRGLKNFSLLLSLSTLYAPLLILKYMDLFLKLRSSQDSE  
EEVPINKRLAYRVDIFLSLQPYAKPLVLLVATLLLIGLGLALYGVNDDSLDCLWLSWT  
FVADSGNHANAEGFGPKLVSVSISIGGMLVFAMMLGLVTDSISEKFDSLKGRSEVIEQS  
HTLVLGWSDKLGSLLNQIAIANESLGGGTIVVMAEKDKEEMEADI AKMEFDLKGTAIICR  
SGSPLILADLKKVSVSKARAIIVLAEEGNADQSDARALRTVLSLTGVKEGLRGHIVVELS  
DLNEVLVKLVGGDLVETVVAHDVIGRLMIQCARQPGLAQIWEDILGFENCEFYIKRWPE  
LDGMQFEDVLISFPDAIPCGIKVASYGKIIINPDDFYVLQEGDEVLVIAEDDDTYAPAP

LPKVMRGYLPKDFVVPKSPERILFCGWRRDMEDMIMVLDAFLAPGSELWMFNDVPEMDRE  
RKLIDGGGLDFSRLNITLVHREGNAVIRRHLESPLLESFDSILILADESVEDSAIQADSR  
SLATLLLIRDIQAKRLPFREAMVSHVTRGSFCEGSWIGEMQQASDKSVIISEILDPRTKN  
LLSVSKISDYVLSNELVSMALAMVAEDRQINDVLEELFAEQGNEMQIRPADLYLREDEEL  
NFFEVMRLGRQRKEIVIGYRLVDAERAIINPPDKVSRRRWSAKDVFVITEKE

>Lj-CASTOR (*Lotus japonius*)

MSLDSEVSVSSSSGRDWFPPSPSFFRSSPSQYGRRFHTNSNTHSAPSSTYPSGIRHRRRV  
KFSRTPPTSSNEKPQISIVSDKPSAISKNLNWLSQFGLQFALVTLTIVFLLLLLLRNTH  
LESQVNKLQGEILRLHACHQLDTLNVSSSTAHSQDTHPCSCENFKRNLALFLSFMLLI  
PLIIFKYIDYVSRRLSENISEQVSLNKQIAYRVDVFLSVYPYAKPLVLLVATLLIFLG  
GLTLFGVTTEDLGHCLWLSWTYVADSGNHASSEGIGPRLVAVSISFGGMLIFAMMLGLVS  
DAISEKFDSL RKGKSEVVEQNHTLILGWSDKLGSLNQLAIANESLGGGTIAVMAERDKE  
DMELDIGKMEFDFKGTSVICRSGSPLILADLKKVSVSKARTIIVLAEDGNADQSDARALR  
TVLSLTGVKEGLRGHIVVEMSDLDNEVLVKLVGGDLVETVVAHDVIGRLMIQCARQPGLA  
QIWEDILGFENCEFYIKRWPQLDGMLFEDVLISFPAAIPCGIKVASYGKIIINPDDSYV  
LQEGDEVLVIAEDDDTYAPAPLPMVRRGSLPKDFVYPKSPERILFCGWRRDMEDMITVLD  
ASLAPDSELWMFNDVPEKEREKKLIDGGGLDISRLNISLVNREGNAVIRRHLESPLLESF  
DSILILADESVEDSAIQADSRSLATLLLIRDIQARRLPYVAMASQTQGGNFSKGSWIGEM  
KQASDKTVIISEILDPRTKNLLSMSKISDYVLSNELVSMALAMVAEDRQINDVLEELFAE  
EGNEMHIRQADIYLRGEEMSFYEIMLRARQRREILIGYRLANAERAVINPPAKTGRRKW  
SLKDVFVITEKE

>Lj-POLLUX (*Lotus japonicus*)

MIPLPVAANSNSNSNSNDEESPNLSTVIKPLKTKTKLLPPPSSSSSNRPLHLRVSI  
DNNNNNAPPADFSHQWNYPSFLGTTTRKRRPSSVKPPSTSNLRFDTIPKTKTKTKT  
NTNTNTNTNTNTNTDLPVVPPSSSPVARPQHNNHRSPPIFYLLIITCIIIFVPYSSYL  
QYKLAKLEDHKLHLCRQSQIHFSGGHNGKISIPIHDAFSYILSRKAALYIVLFTLILP  
FLLYKYLDYLPQIINFLRRTHNKNEDVPLKKRIAYMLDVFFSIYPYAKLLALLFATLFLI  
GFGGLALYAVTGGSLAEALWHSWTYVADSGNHAETQGTGQRVVSIVSSGGMLIFAMMLG

LVSDAISEKVDSL RKGKCEVIERNHILILGWSDKLGSL LKQLAIANKSVGGGVIVVLAEK  
EKEEMEMDITKLEFDFMGTSVICRSGSPLILADLKKVSVSKARAIIVLASDENADQSDAR  
ALRVVLSLTGVKEGLRGHVVEMSDLDNEPLVKLVGGELIETVVAHDVIGRLMIQCALQP  
GLAQIWEDILGFENAEFYIKRWPELDGLSFKDILISFPDAIPCGVKVAADGGKIVINPDD  
SYVMRDGDEVLVIAEDDDTYSPGSLPEVLKGGFFPRIPDAPKYPEKILFCGWRRDIDDMIM  
VLEAF LAPGSELWMFNEVPEKEREKLAAGGLDVFLENIKLVHREGNAVIRRHLESPL  
ETFDSILILADESVEDSVAHSDSRSLATLLLRDIQSRRLPYKDTKSTSLRSLSGFSHNSW  
IREMQQASDKSIIISEILDSRTRNLVSVSRISDYVLSNELVSMALAMVAEDKQINRVLEE  
LFAEQGNEMCIKPAEFYLFQEEELCFYDIMIRGRARQEIIIGYRLANQERAIINPSEKLV  
ARKWSLGDV FVVIASGD

>At5g49960 (Arabidopsis)

MPIHTPRRTSLFQRSKTLPTNSYRRFTSPVIPTFRYDDGDTVSYDGDSSNLPTVPNPEE  
KPVVPVSPSQSPQRITRLWTQFSLTHCLKFICSCSFTYVMFLRSKVSRLAENIILLTRCN  
SSSDNNEMEETNSRAVFFSVIITFVLPFLLYMYLDDL SHVKNLLRRTNQQKEDVPLKKR  
LAYS LDVCF SVYPYAKLLALLLATVVLIVYGG LALYAVSDCGVDEALWLSWTFVADSGSH  
ADRVGVGARIVSVAISAGGMLIFATMLGLISDAISKMVDSL RKGKSEVLESNHILILGWS  
DKLGSL LKQLAIANKSIGGGVVVLAERDK EEMETDIAKFEFDLMGTSVICRSGSPLILA  
DLKKVSVSNARAIIVLGS DENADQSDARALRVVLSLTGVKEGWKGHV VEMCDLDNEPLV  
KLVGGERIETVVAHDVIGRLMIQCALQPGLAQIWEDILGFENAEFYIKKWPQLDGYCFED  
VLISFPNAIPCGVKVAADGKIVLNP SDDYVLKEGDEILVIAEDDDTYAPGSLPEVRMCHF  
PKMQDPPKYPEKILFCGWRRDIDDMIKVLEALLAPGSELWMFNEVPDQEREKKT DAGLN  
ISKLVNIKLVHRQGN AVIRRHLESPLETFDSILILAEQ SLENSIVHSDSRSLATLLLR  
DIQSKRLPYKDAKSSALRISGFPNCCWIRKMQQASDKSIVISEILDSRTKNL VSVSRISD  
YVLSNELVSMALAMVAEDKQINRVL KELFAEKGNELCIRPAEFYIYDQEEVCFYDIMRRA  
RQRQEIIIGYRLAGMEQAVINPTDKSKLTKWSLDDV FVVIASSQ

>Vv-CASTOR (Grape)

MSIDSESPSPSPSRDWF FSPSPFIHPNPNPNRR CVTNPRISRPPKSSSFQSF SHSSSKY  
AGIRRRVEFARRTESLPASNVARPLSAQKPDVPVKKPDVSDVSGEKKFAWACAGRF GGR

WRMAILAAESDHLPNRNLKNMALIITFTLLFIPFLIFKYVDYVSKSRRSADNISEEVSLN  
KQLAYQVDAFLSVHPYAKPLALLVATLLLICLGGALFGVTVDLADCLWLSWTYIADSG  
NHANSEGIGPRLVSVSISFGGMLIFAMMLGLVSDAISEKLDLKRGRSEVVEQNHTLILG  
WSDKLGSLLNQLSIANESLDGGIVVLAERDKEEMELDIKMEFDFRGTSVICRSGSPLI  
LADLKKVSVSKARAIIVLAEDGNADQSDARALRTVLSLTGVKEGLRGHIVVELSDLDNEV  
LVKLVGGDLVETVVAHDVIGRLMIQCARQPGLAQIWEDILGFENCEFYIKRWPELDGMQF  
EDVLISFPDAIPCGIKAAAYGGKIIILNPDDSYILQEGDEVLVIAEDDDTYAPATLPMVWC  
GKLPKNFIVPKSAEKILFCGWRRMEDMIMVLDAFLANGSELWMFNDVPEKERERKLIDG  
GLDINRLLNITLVNREGNAVIRRHLESPLSFDSILILADESVEDSAIQADSRSLATLL  
LIRDIQAKRLPYREAMVTQGHRSFSQGSWIGEMQQASDKSVIISEILDPRTKNLLSMK  
ISDYVLSNELVSMALAMVAEDRQINDVLEELFAEEGNEMQIRQANLYLREGHEELSFYEII  
LRARQRREIVIGYRQSSAERAIINPPAKNEKQRWSLKDFVIVIAEKE

>Vv-POLLUX (Grape)

MPQIKIPNSNPKPNPKYERPPVLKKSRTISDDVVPAPHFPGPLFAVRRSSPSPPPPPP  
PPASSTAADVSGFSDRDWLFPSFLGPHTVRGRVPVQAAKSPKHDFSHSHSGSPNRSRSM  
SGLGGGGHGEMVESMRLIGVLRSSTEVPESEKEAKPVAVRSSSTGLSARRARGFKRSVY  
LYLLILTCIFSVSYAIYLRNEVTKLQANKYSCACTYIGVFLSVIKVAWVTFRTVALYTV  
LFTLAMPFVYKCLDYFPQVKNLNRTKCNKEEVPLKKRIAYMVDVCFVYPYAKLLALL  
FATIFLIGFGGLALYAVSDGSLAEALWLSWTFVADSGNHADRVTGQRIVSVSISGGML  
IFAMMLGLVSDAISEKVDLKRKGVSEVIERNHILILGWSDKLGSLLKQLAIANKSIGGGV  
VVVLAERDKEEMEMDIKLEFDFMGTSVICRSGSPLILADLKKVSVSKARAIIVLASDEN  
ADQSDARALRVVLSLTGVKEGLKGHVVEMSDLDNEPLVKLVGGELIETVVAHDVIGRLM  
IQCALQPGLAQIWENILGFENAEFYVWRWPQLDGMCFEDVLISFPEAIPCGIKVASDGGK  
IILNPEDNYVLRGDEVLVIAEDDDTYAPGPLPEVHRVPFHGVISPPKYPERILFCGWRR  
DIDDMILVLEAFAPGSELWMFNEVPIKEREKLLTDGGFDIFGLVNIKLVHHEGNAVIRR  
HLEDLPLETFDSILILADESLEDIVHSDSRSLATLLLIRDIQSKRLPDRDTKSAASRHS  
GFSHSSWICEMQQASDKSVIISEILDSRTRNLVSVSRISDYVLSNELVSMALAMVAEDKQ  
INRVLEELFAEEGNEMCIRPAEFYLFQEEELCFYEIMIRGRQRREIVIGYRLATTERAI

NPPDKSKRRKWSIEDVFFVVISI

>Mt-DMI1 (*Medicago truncatula*)

MAKSNEESSNLNVMNKPPLKKTTLPSLNLRVSVTPPNPNDNNGIGGTSTTKTDFSEQQW  
NYPSTFLGIGSTSRKRRQPPPPPSKPPVNLIPPHRPLSVNDHNKTTSSLLPQPSSSSITK  
QQQQHSTSSPIFYLLVICCIILVPYSAYLQYKLAKLKDMKLQLCGQIDFCSRNGKTSIQE  
EVDDDDNADSRITIALYIVLFTLILPFVLYKYLDYLPQIINFLRRTESNKEDVPLKRVAY  
MVDVFFSIYPYAKLLALLCATLFLIAFGGLALYAVTGGMAEALWHSWTVADAGNHAET  
EGTGQRIVSVSISAGGMLIFAMMLGLVSDAISEKVDSLRLKKGSEVIERNHVLILGWSDKL  
GSLKQLAIANKSVGGGVIVVLAEEKEEEMEMDIKLEFDFMGTSVICRSGSPLILADLK  
KVSVSKARAIIVLAADENADQSDARALRVVLSLAGVKEGLRGHVWVEMSDLDNEPLVKLV  
GGELIETVVAHDVIGRLMIQCALQPGLAQIWEDILGFENAEFYIKRWPEDDLLFKDILI  
SFPDAIPCGVKVAADGGKIVINPDDNYVLRDGEVLVIAEDDDTYAPGPLPEVRKGYFPR  
IRDPPKYPEKILFCGWRRDIDDMIMVLEAF LAPGSELWMFNEVPEKERERKLAAGELDVF  
GLENIKLVHREGNAVIRRHLESPLLETFDSILILADESVEDSVAHSDSRSLATLLLRDI  
QSRRLPYRDTKSTSLRLSGFSHNSWIREMQQASDKSIIISEILDSRTRNLVSVSRISDYV  
LSNELVSMALAMVAEDKQINRVLEELFAEEGNEMCIKPAEFYLFQEEELCFYDIMIRGRT  
RKEIVIGYRLANQERAIINPSEKSVPRKWSLDDVFVVLASGE

>Ps-SYM8 (Pea)

MAKSNEEPNSNLNTNKPPLKRTKTLAQQPSLNLRVSIAAADNGIGNSSSSSTKTDFEQQQ  
WNYPSTFLGIGSTSRKRRPPPPKPSNLTPNLKPPASDFQTKPHSEPKTSPSSSSPPLPI  
AITKQQQQHSISSPIFYLVITCVIFVPYSAFLQYKLAKLKDMKLQLCCQIDFCGNGK  
TSLQKDVDDGFSFSYILNADSRITISLYIVLFTLVLPFIFYKYIDYLPQMINFSRRTNSN  
KEDVPLKRVAYMVDVFFSIYPYAKLLALLFATLFLIAFGGLALYAVTGGMAEALWHSW  
TVADAGNHAETEGMGQRIVSVSISAGGMLIFAMMLGLVSDAISEKVDSLRLKKGSEVIER  
NHVLILGWSDKLGSLLKQLAIANKSVGGGVIVVLAEEKEEEMEMDIKLEFDFMGTSVIC  
RSGSPLILADLKKVSVSKARAIIVLASDENADQSDARALRVVLSLTGVKEGLRGHVWVEM  
SDLDNEPLVKLVGGELIETVVAHDVIGRLMIQCALQPGLAQIWEDILGFENAEFYIKRWP  
ELDGLLFKDILISFPDAIPCGVKVSADGGKIVINPDDNYVLRDGEVLVIAEDDDTYAPG

PLPEVRKGYFPRIRDPPKYPEKILFCGWRRDIDDMIMVLEAF LAPGSELWMFNEVPEKQR  
ERKLAAGELDVFGLENIKLVHREGNAVIRRHLES LPLETFDSILILADESVEDSVAHSDS  
RSLATLLLIRDIQSRRLPYRDTKSTSLR LSGF SHNSWIREMQQASDKSIIISEILDSRTR  
NLVSVSRISDYVLSNELVSMALAMVAEDKQINRVLEELFAEEGNEMCIKPAEFYLFQEE  
LCFYDIMIRGRTRKEIVIGYRLASQERALINPSEKSMTRKWSLDDVFVVIASGE

>Pt-POLLUX (Poplars)

MADIKKDSVSPPPQPPSLPPTNRDDVSRKASERPLKKTSSIPDDTHFPGLFP  
AVRRTAPPPLTPSTHHLRPPLSDLRLSTNSNHHTTVNATNSSIDISSSSNNSFSVDRD  
WMYPSFLGPHVARSRVTVKGRRGYNKVAEAEAEKEKHNTGATPSSITTSTDASAANKG  
KVKEEKLLKVDDDIKEVKTAATQVLVTRSGVNRSGFKSSIFYLLNFTCTVFMSFSIY  
LSNKVAKLEVCFIYIFCRTVALYTMFTLAIPFLLYKYLDYLPQIKTLSKRTMNNKEEAP  
LKKRVAYMVDVCFVYPYAKLLALLFATIFLIGFGGLALYAVSDGSLAEALWLSWTFVAD  
SGNHADRVGTGPRIVSVSISGGMLIFAMMLGLVSDAISEKVDLSRKGKSEVIEKNHILI  
LGWSDKLGSLLKQLAIANKSIGGGVIVVLAERDKEEMEMDIAKLEFDFMGTSVICRSGSP  
LILADLKKVSVSKARAIIVLASDENADQSDARALRVVLSLTGVKEGLRGHVVEMSDLDN  
EPLVKLVGGELIETVVAHDVIGRLMIQCALQPGLAQIWEDILGFENAIFYIKRWPQLDGL  
LFQDVLISFPEAIPCGVKVAAEGGKIKLNPDDNYALKEGDEILVIAEDDDTYAGPLPEV  
CRSSCPKTMPPKYPEKILFCGWRRDIDDMIMVLEALLAPGSELWMFNEVPEKEREKLT  
DGGLDIHGLENITLVHREGNAVIKRHLENLPLETFDSILILADESLEDIVHSDSRSLAT  
LLLIRDIQLKRLPHRDAKPTSLRISGFSHSSWIREMQQASDKSIIISEILDSRTRNLVSV  
SRISDYVLSNELVSMALAMVAEDKQINRVLEELFAEEGNEMCIKPAEFYLFQEEIPFYE  
IMIRGRQRNEIVIGYRLANAERAIINPPEKSEPRKWSLDDVFVVISLGD

>Pt-CASTOR (Poplars)

MSLDSQDSTSPSFNRDWFPPSPSFIHQSPPKPKPHRRFSTASKHSPGSNISNPPSFRSS  
PSLSPTTT SKYGRLRRRVELPRPPDKYSIQHQND SVLDRKPAVSSEKKQSTDQILKLNVR  
LRACNLLSNVDTFDSVMQELDDIGYGSNGLKNLALIVSVTLLSIPVLAFKYIDFVSKSR  
SSDSVSEEALLNKQLAYRVDIFLSVHPYAKPLALLVATLLVICLGGALFGVTDDNLADC  
LWLSWTFVADSGNHANTEGIGPRLVSVSISFGGMLIFAMMLGLVSDAISEKFDSLKGRS

EVVEQNHTLILGWSDKLGSLLNQLGIANESLGGGIVVMAERDKKEEMMDIAKMEFDFKG  
TSVICRSGSPLILADLKKVSVSKARAIIVLAEDGNADQSDARALRTVLSLTGVKEGLKGH  
IVVELSDLNEVLVKLVGDLVKTVAHDVIGRLMIQCARQPGLAQIWEDILGFENCEFY  
IKRWPQLHGMQFEDILISFPDAIPCGIKVASCDGKIIILNPEDSYVLQEDDEILVIAEDDD  
SYAPAALPTVWRGSLPKDFIGPKSAEKILFCGWRRDMEDMIMVLDAFLAPGSELWMFNDV  
PENEREKKLIDGGLDLSRLENIQLVNREGNAVIRRHLESPLQSFDSILILADESVEDSA  
IQADSRSLATLLLIRDIQVLDLTKVLRPLMVNQVRRGTFSQGSWIGEMQQASDKSVIISE  
ILDPRTKNLLSMSKISDYVLSNELVSMALAMVAEDQQINDVLEELFADEGNELQIRQADL  
YLSEGEELS FYEVLLRARQRREIVIGYRAANA EKAVINPPAKSERRRWSLKDFV FVIAEK  
E

>Zm-CASTOR (Maize)

MPLDPDSSSPPPHRDWFFPPAPPFLASSRRTPSAPFPSTYRSSKPYSAYPLADRRPPP  
TPRSRSRSPHPPEQQQKTPTPTPTSAPRRRDPYAGVRREDARTAASEQAAAPMAAPV  
HGRKPAASAIAPRWGVLVAVILLCLASLLRRNFSLHDQVYLLQSRSLKNLSLLISLSV  
LYAPLLILKYVDLVSKIRRSRDSEQVPINKRFAYRVDIFLSLHPYAKPLVLLVATLLLIA  
LGGLALYGVTTDDSLSDCLWLSWTFVADSGNHANAVGLGPKLVSVSISIGGMLVFAMMLGL  
VTDSISEKFDLSLRKGRSEVIEQSHTLILGWSDKLGSLLNQLGIANESLRGGTIVVMAERD  
KEEMEADIAKMEFDMKGTAVICRSGSPLILADLKKVSVSKARAIIVLAEEDGNADQSDARA  
LRTVLSLTGVKEGLSGHIVVELSDLNEVLVKLVGDLVETVVAHDVIGRLMIQCARQPG  
LAQIWEDILGFENCEFYIKRWPKLDGMRFEVDLISFPEAVPCGIKVASYGKIIILNPDDC  
YVLQEGDEVIVIAEDDDTYAPAPLPKVRGYPKDFVVPKSPERILFCGWRRDIEDMIMV  
LDAFLAPGSELWMFNDVPEVDREKRLIDGGLDFSRDNLTLVHREGNAVIRRHLESPLLE  
SFDSILILADESVEDSAIQADSRSLATLLLIRDIQAKRLPCKESLISHVPRGT FSEGSWI  
GEMQQASDKSVIISEILDPRTKNLLSVSKISDYVLSNELVSMALAMVAEDRQINNLEEL  
FAEQGNEMQIRPSMYLREEEELNFFEVILRARQRKEIVIGYRLEAAERAIINPIDKVS  
RRWSPKDFV FVISEKE

>Zm-POLLUX (Maize)

MAESDGGSEAQSPSPDPRSGDANPDPRPPRQLTKSRTISGSVAASILAADR VAGGGGG

SGGGGLRDSILVRRSSTAPLPPYTASAAGASSAPRRLTVAVDDPSYAAPNGGVLDLDRWCY  
PSFLGPHASRPRPPRQQQTATTTERRSANPTVPVPPRVAVSQREEEKSLASVVKRPALLE  
ERRTPPPTLPPPRAPRFDLSPTIFALAIPLFLFKYIDLLRRRQTNSMRGRSGEEEVPLKK  
RIAYKVDFVFFSGHPYAKLLALLLATIILIALGGIALYVVSQSGFLEALWLSWTFVADSGN  
HADQIGLGPRIVSVSISGGMLVFATMLGLVSDAISEKVDSWRKKGSEVIEINHILILGW  
SDKLGSLLKQLAIANKSIGGGVVVLAERDKEEMEMDIAKLEFDFMGTSVICRSGSPLIL  
ADLKKVSVSKARAIIVLASDENADQSDARALRVVLSLTGVKEGLRGHVVEMSDLDNEPL  
VKLVGGELIETVVAHDVIGRLMIQCALQPGLAQIWEDILGFENAEFYIKQWPELDGMRFG  
DVLISFPDAVPCGVKASKSGKILMNPDDGYVLRGDEVLVIAEDDDTYAPAPLPEVNKG  
FLPNIPTPPKYPEKILFCGWRRDIHDMIMVLEAFAPGSELWMFNEVPEKEREIKLTDGG  
LDIGGLINIKLVHKEGNAVIRRHLESPLETFDSILILADESVEDSIVHSDSRSLATLLL  
IRDIQSKRLPSKELKSPHRYNGFSHSAWIREMQHASDKSIIISEILDSRTRNLVSVSKIS  
DYVLSNELVSMALAMVAEDKQINRVLEELFAEEGNEMCIRSAEFYLYEQEELFFDIMVR  
ARERDEIVIGYRLANTDQAIINPEYKSQIRKWSLDDVFVVISKGD

>Gm-POLLUX (Soybean)

MRKSNEESSNLSLRKPPLKRSKTIPNPKHTASAPHFSVSVSDSEQWNYPFLGTTTKKK  
KPSFKPHNLNLSKPSLVPPPPPPPPPTSSSPLSSQVTRPQHQRTPILYLLFITSIV  
FVPHSAYLQYRLTKLEDEKLNLCQIDFCGNERTSIEKVDASFYILNADSRVALYIV  
VVTLILPFVLYKYLDYLPQIINFLRRTNNKEDVPLKRVAYIVDVFFSVYPYAKLLALL  
FATLFLIGFGGLALYAVTGGFAEALWHSWTYVADSGNHAETEGTQQRIVSVSISGGML  
IFAMMLGLVSDAISEKVDSLKKGSEVIEKNHILILGWSDKLGSLLKQLAIANKSVGGGV  
IVVLAEKEKEEMEMDIAKLEFDFMGTSVICRSGSPLILADLKKVSVSKARAIIVLASDEN  
ADQSDARALRVVLSLTGVREGLGGHVVEMSDLDNEPLVKLVGGELIETVVAHDVIGRLM  
IQCALQPGLAQIWEDILGFENAEFYIKRWPELDGLFFKDVLISFPDAIPIGVKVAADGGK  
IIINPDDSYVLRDGEVLVIAEDDDTYAPGLLPEVCKGLCPWIRDPPKYPEKILFCGWRR  
DIDDIMVLEALLAPGSELWMFNEVPEKEREKLVGGLDVSELENIKLVHREGNAVIRR  
HLEGLPLETFDSILILADESVEDSVAHSDSRSLATLLLIRDIQSRRLPYRDTKSTSLRLS  
GFSHNSWIREMQASDKSIIISEILDSRTRNLVSVSRISDYVLSNELVSMALAMVAEDKQ



INRVLEELFAEEGNEMCIKPAEFYLFQEEELCFYNIMIRGRTRKEIVIGYRLANQDRAII  
NPSEKSVPRKWSLGDVFVVIKGD

>Gm-CASTOR (Soybean)

MSLDSETSGSARDWFFPSPSFLRSSSSQYGRRFYSNSKPHSPPSSSTRIRHRRRVKFPRT  
PTNDKSQSDTENVKSSATARNNLICLSQFRFQFALVTLTIVFLLLLLRNTHLESQVTKL  
QGEILGLNHRLHACHKLDTLVYTSSISQDVPWSRENFKRNLALFFSFTLLFIPLLIKFY  
IGFVSKSRFSDNISEQVSLNKQIAYRVDVFLSVYPYAKPLVLLVATLLLIIFLGGALFGV  
TTEDLAHCLWLSWTYVADSGNHASSQGIGPRLVAVSISFGGMLIFAMMLGLVSDAISEKF  
DSLKRGKSEVVEQNHTLILGWSDKLGSLLNQLAIANESLGGGTAVMAERDKEEMELDIA  
KMEFDKGTSVICRSGSPLILADLKKVSVSKARAIIVLAEDGNADQSDARALRTVLSLTG  
VKEGLRGHIVVELSDLNEVLVKLVGGLVETVVAHDVIGRLMIQCARQPGLAQIWEDIL  
GFENCEFYIKRWPQLEGMQFEDVLISFPAAIPCGIKVASYGKIIILNPDDSYVLQEGDEI  
LVIAEDDDTYAPASLPTVWRGSLPKDFVYPKSPERILFCGWRRDMEDMIMVLDASLAHGS  
ELWMFNDVPEKEREKKTLDGGLDINLENISLVNREGNAVIRRHLESPLSFDSILILA  
DESVEDSAIQADSRSLATLLLIRDIQARRLPYVSMASQAHGGSFSKGSWIGEMKQASDKT  
VIISEILDPRTKNLISMSKISDYVLSNELVSMALAMVAEDRQINDVLEELFAEEGNEMHI  
RKADLYLCEGEELNFYEIMLRARQRREIVIGYRLANAERAVINPPVKTDRRKWSLKDFV  
VITEKE

>Sb-POLLUX (Sorghum)

MAESDGGSEADSPSPDPRSGGGASPDPRPPRPQLTKSRTISGSAAASILAADRGGGGGG  
GGGGLRDSILVRRSSTAPLPPSTASAAGASSAPRRLTVAVDDPSSYAAPNGGVLDRWCY  
PSFLGPHASRPRPPRQQQTPTTTDRRSANPTVPVPPRVVVSQREEEKSLASVVKRPALLE  
ERRPLPPIPPPAPRFDLSPYLPLLLVVTIASSTLAVWQWMKVMGLQEKIRSCSNGNAG  
DREGTEKMSWIDRDHGSAFIGSGSWNLTPSGTIFALAVPLFLFKYIDQLRRRQTNSMRGR  
SGEEEVPLKKRIAYKVDVFFSGHPYAKLLALLLATIVLIAWGGIALYVVS GSGFLEALWL  
SWTFVADSGNHADQVGLGPRIVSVSISGGMLVFATMLGLVSDAISEKVD SWRK GKSEVI  
EINHILILGWSDKLGSLLKQLAIANKSIGGGVVVLAERDKEEMEMDIKLEFDFMGTSV  
ICRSGSPLILADLKKVSVSKARAIIVLASDENADQSDARALRVVLSLTGVKEGLRGHV

EMSDLNEPLVKLVGGELIETVVAHDVIGRLMIQCALQPGLAQIWEDILGFENAEFYIKR  
WPELDGMRFGDVLISFPDAVPCGVKASKSGKILMNPDDDYVLREGDEVLVIAEDDDTYA  
PAPLPEVNKGF LPNIPTPKYPEKILFCGWRRDIHDMIMVLEAF LAPGSELWMFNEVPEK  
EREIKLTDGGLDIGGLTNIKLVHKEGNAVIRRHLESPLETFDSILILADESVEDSIVHS  
DSRSLATLLLIRDIQSKRLPSKELKSPHRYNGFCHSAWIREMQHASDKSIIISEILDSRT  
RNLVSVSKISDYVLSNELVSMALAMVAEDKQINRVLEELFAEEGNEMCIRSAEFYLYEQE  
ELSFDMVRARERDEVVIGYRLANTDQAIINPEHKSDIRKWSLDDVFVVISKGD

>Sb-CASTOR (Sorghum)

MPLDPDSSSPPPAPPHRDWFPPAPPFLPSSRARTPRTPFPSTYRSSRPYSAYSLADRRP  
PTTPRSRSRSPHPPEQQQLTPQPQPPSAPRRRDPYAGVRREDVRTAASEQAAAPKAA  
PVHGRKPAASAIVPRWSGVL SAAVILLCLASLLRRNFSLHDQVYHLQEQLVATAKLQSC  
IVDSSLDTSSINMFYQDANSTTQNRSLKYLSLLISLSVL YAPLLILKYVDLVSKIRSSRD  
SEEVPI NKRFAYRVDIFLSLHPYAKPLVLLVATLLLIALGGLALYGVTDSDSLDCLWLSW  
TFVADSGNHANAEGFGPKLVSVSISIGGMLVFAMMLGLVTDSISEKFD SLRKRSEVIEQ  
SHTLILGWSDKLGSLLNQIAIANESLGGGTIVVMAERDKEEMEADI AKMEFDLKGTAVIC  
RSGSPLILADLKKVSVSKARAI VVLAEEGNADQSDARALRTVLSLTGVKEGLSGHIVVEL  
SDLDNEVLVKLVGGDLVETVVAHDVIGRLMIQCARQPGLAQIWEDILGFENCEFYIKRWP  
KLDGMR FEDVLISFPDAVPCGIKVASYGGKIILNPDDCYVLQEGDEVIVIAEDDDTYAPA  
PLPKVRRGYLPKDFVVPKSPERILFCGWRRDIEDMIMVLDAFLAPGSELWMFNDVPEVDR  
ERKLIDGGLD FSRLDNITLVHREGNAVIRRHLESPL ESFDSILILADESVEDSAIQADS  
RSLATLLLIRDIQAKRLPYKESLVSHVSRGTFSEGSWIGEMQQASDKSVIISEILDPRTK  
NLLSMSKISDYVLSNELVSMALAMVAEDRQINNVL EELFAEQGNEMQIRPSDLYLREEEE  
LNFFEVILRARQRKEIVIGYRLEAAERAIINPTDKVSRRRWSPKDV FVVI SEKE

**Supplemental Figure 1.** Alignment of the CASTOR and POLLUX homologs in plants. The alignment was based on C-terminal ~650 amino acids of the proteins. Sequence alignments were performed using ClustalX (Thompson et al., 1997).

**Supplemental sequence data.** The amino-acid sequences of CASTOR and POLLUX homologs were predicted using FGENESH+ (HMM plus similar protein-based gene prediction; <http://linux1.softberry.com/berry.phtml>). The *L. japonicus* CASTOR and POLLUX sequences were used as references. The nucleotide sequences were downloaded from the following websites: <http://www.ncbi.nlm.nih.gov/>; <http://www.phytozome.net/>; and <http://maizesequence.org/index.html>.
